# Supplementary material for: Evolution of Plant Nucleotide-Sugar Interconversion Enzymes
Source: PubMed Central journal article supplement (PMC3220709; doi:10.1371/journal.pone.0027995), 2011-11-18

# Fig. S3: RHM-N

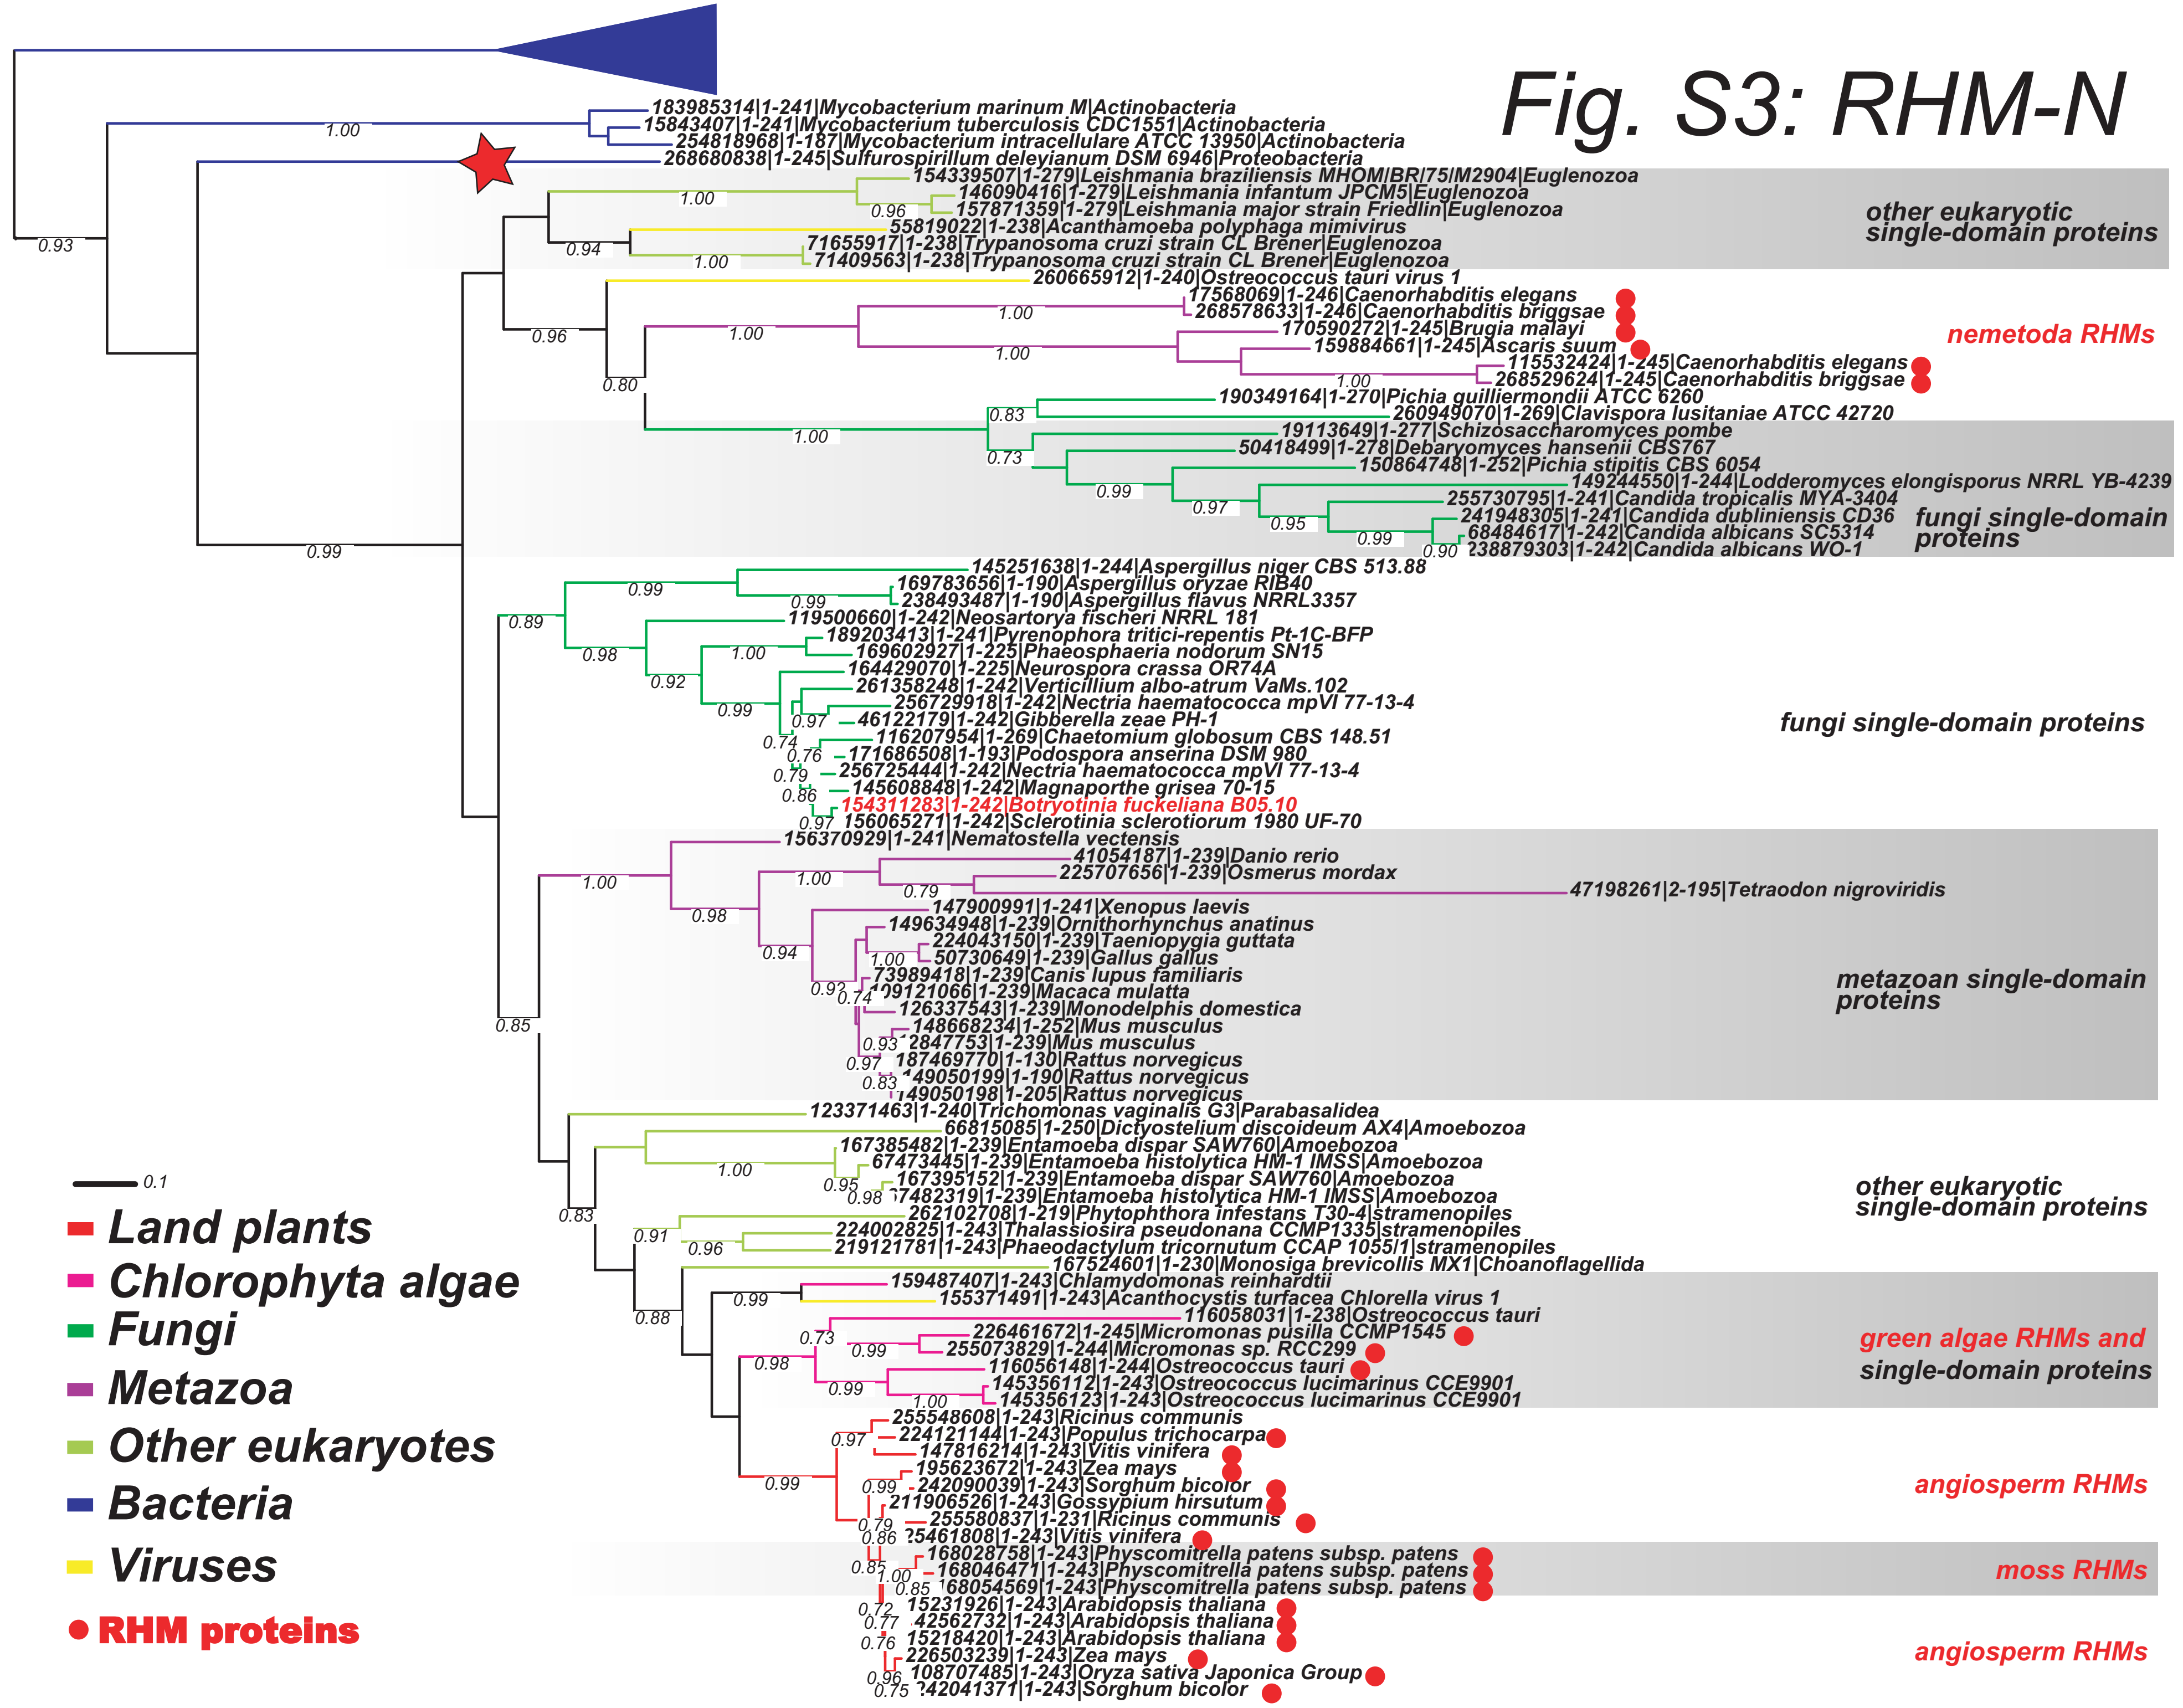

Supplement: pone.0027995.s003.pdf [file pone.0027995.s003.pdf]
