# Supplementary material for: Evolution of Plant Nucleotide-Sugar Interconversion Enzymes
Source: PubMed Central journal article supplement (PMC3220709; doi:10.1371/journal.pone.0027995), 2011-11-18
Supplement: pone.0027995.s012.pdf [file pone.0027995.s012.pdf]

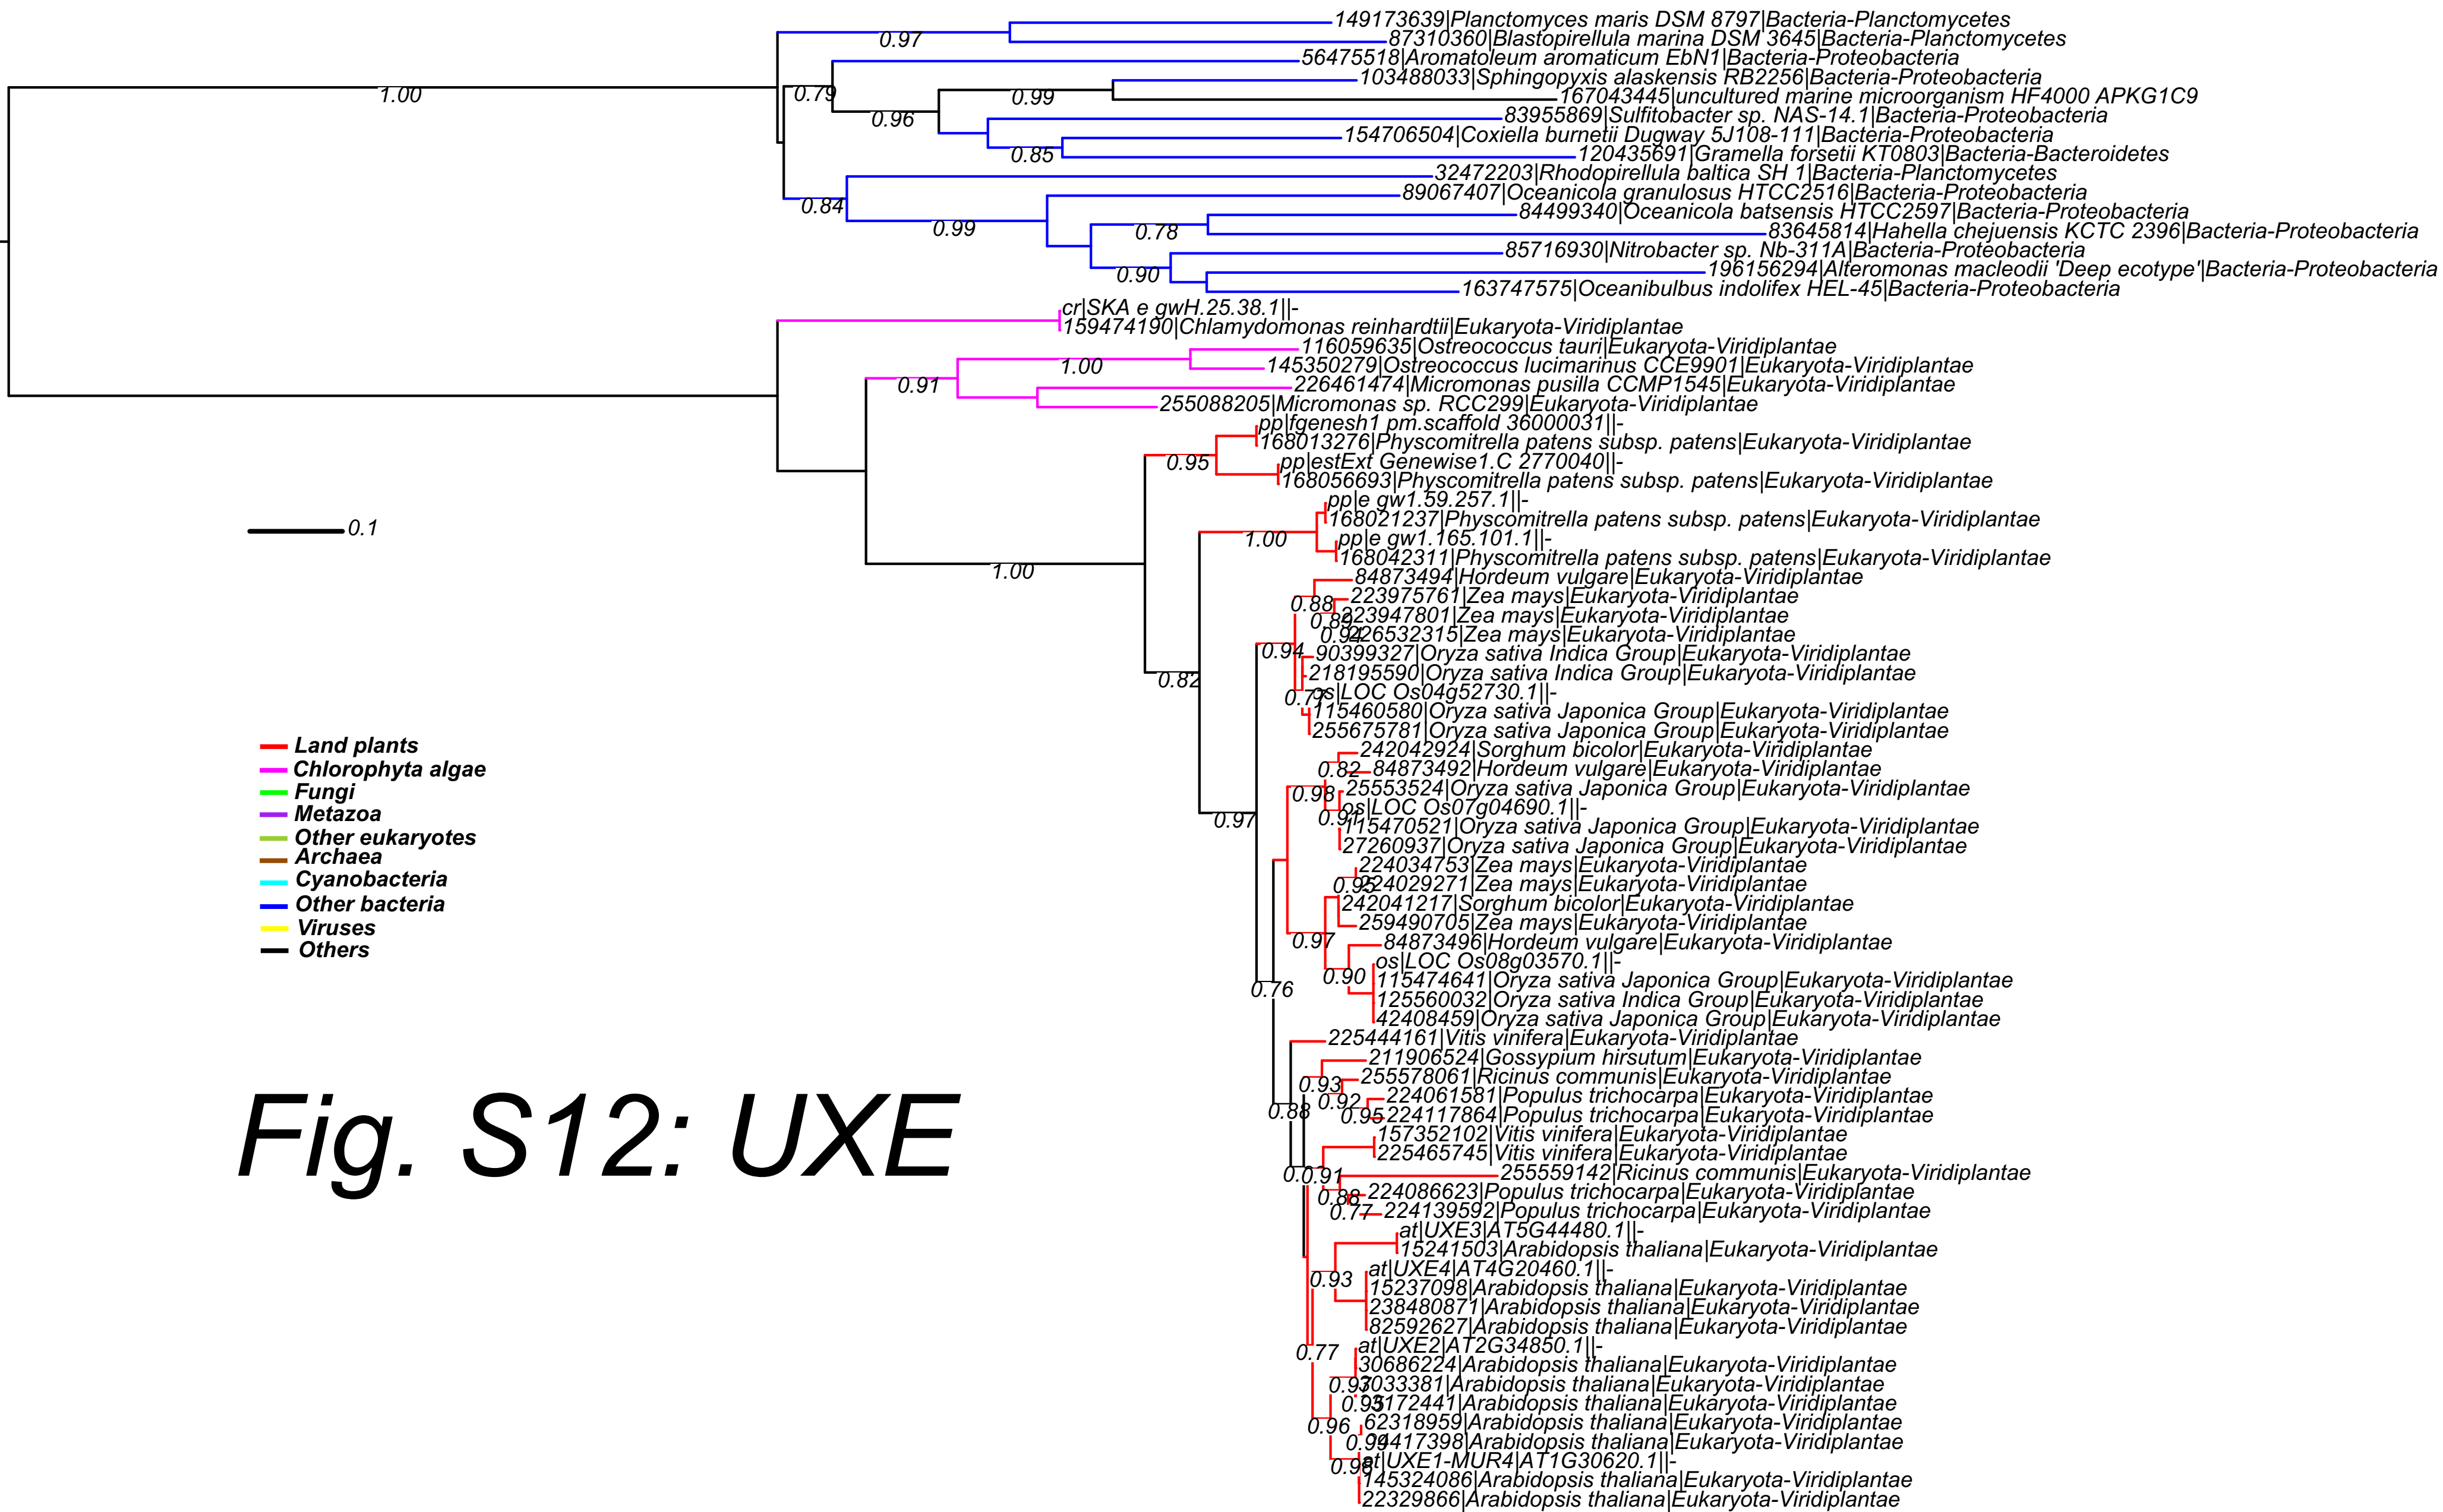

**Fig. S12: UXE**
