# Supplementary material for: Evolution of Plant Nucleotide-Sugar Interconversion Enzymes
Source: PubMed Central journal article supplement (PMC3220709; doi:10.1371/journal.pone.0027995), 2011-11-18
Supplement: pone.0027995.s015.pdf [file pone.0027995.s015.pdf]

Fig. S15: UGD

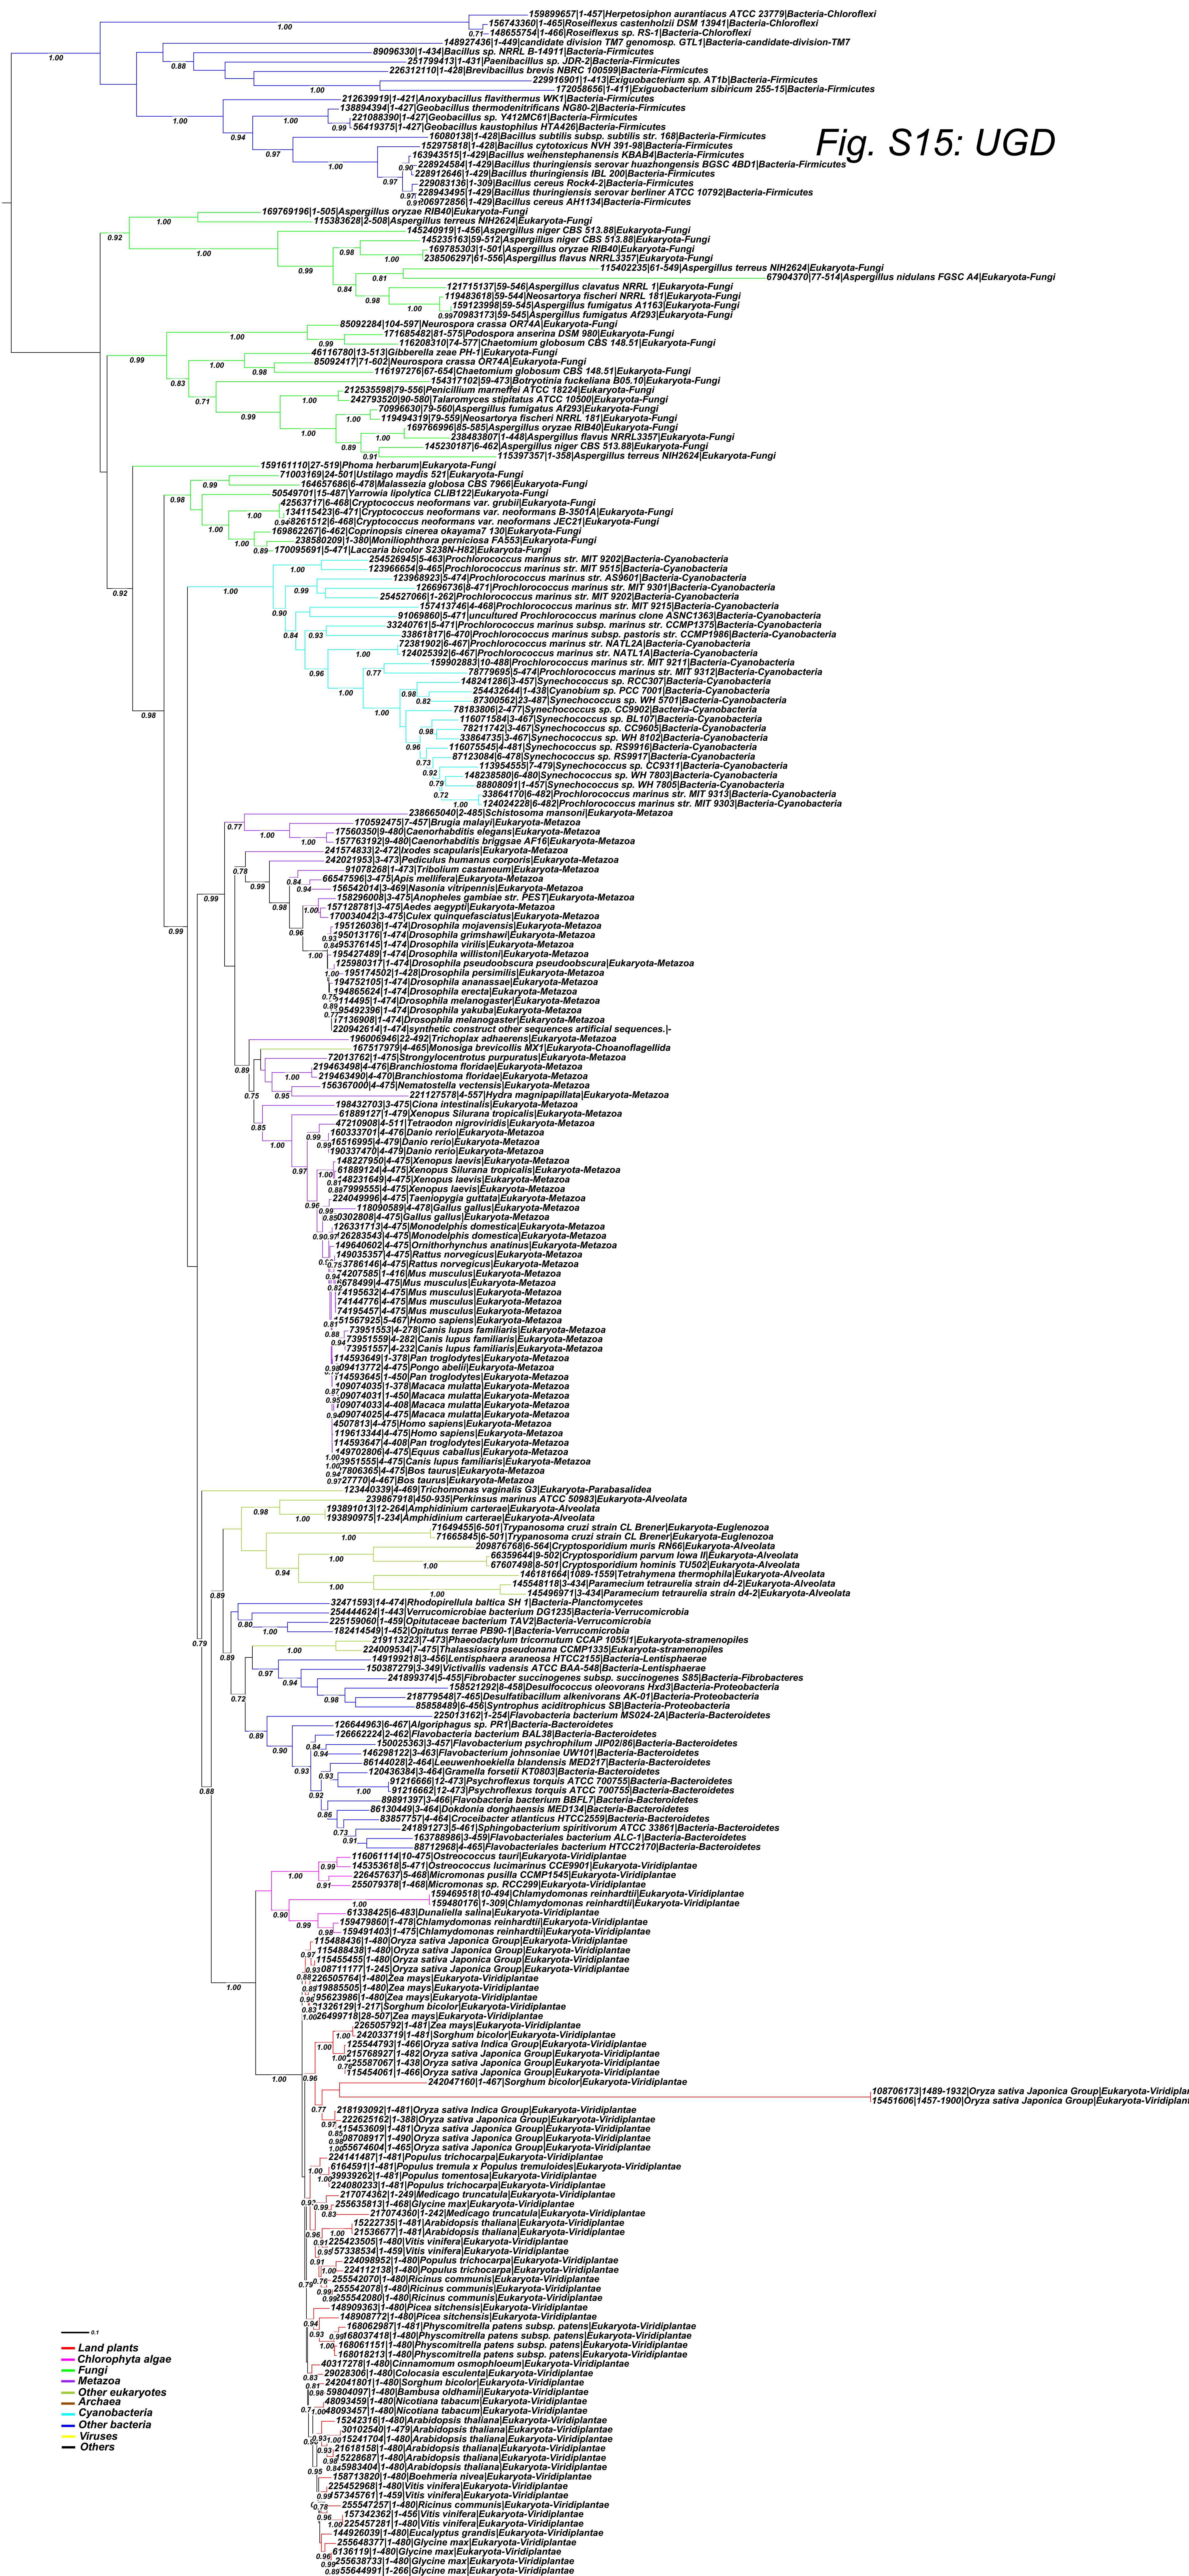

- Land plants
- Chlorophyta algae
- Fungi
- Metazoa
- Other eukaryotes
- Archaea
- Cyanobacteria
- Other bacteria
- Viruses
- Others
